# Supplementary figures and images for: Coexistence of blaIMP-4, blaNDM-1 and blaOXA-1 in blaKPC-2-producing Citrobacter freundii of clinical origin in China
Source: Frontiers journal article supplement (doi:10.3389/fmicb.2023.1074612), 2023-06-12

*bla*IMP


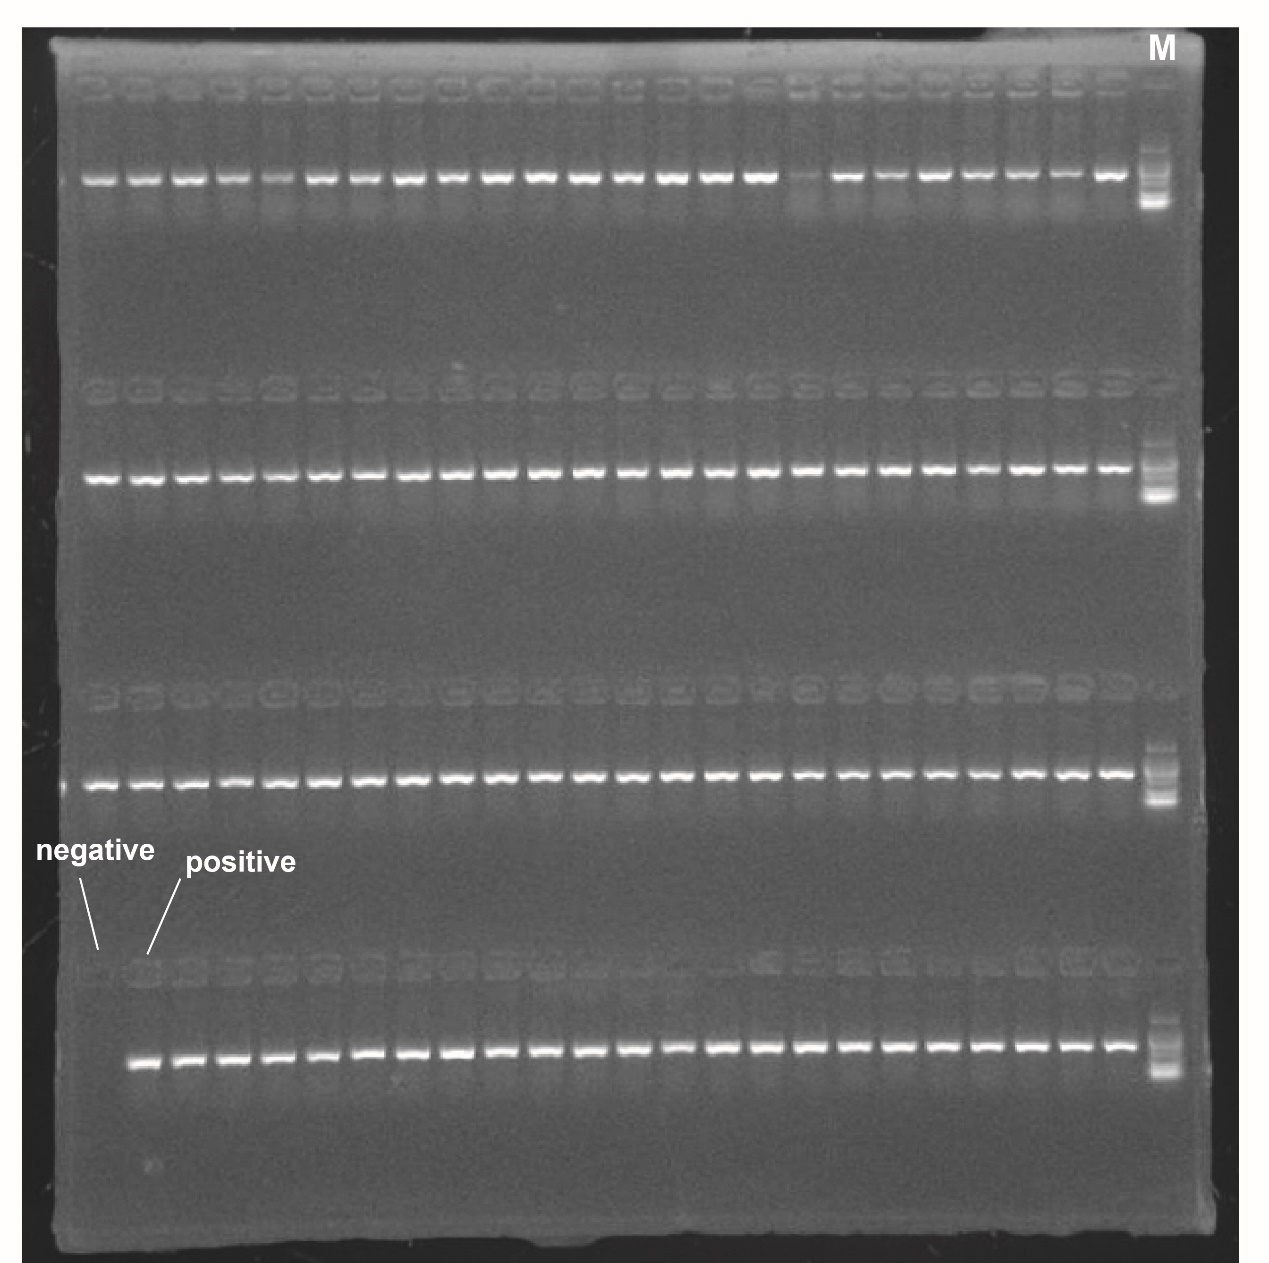


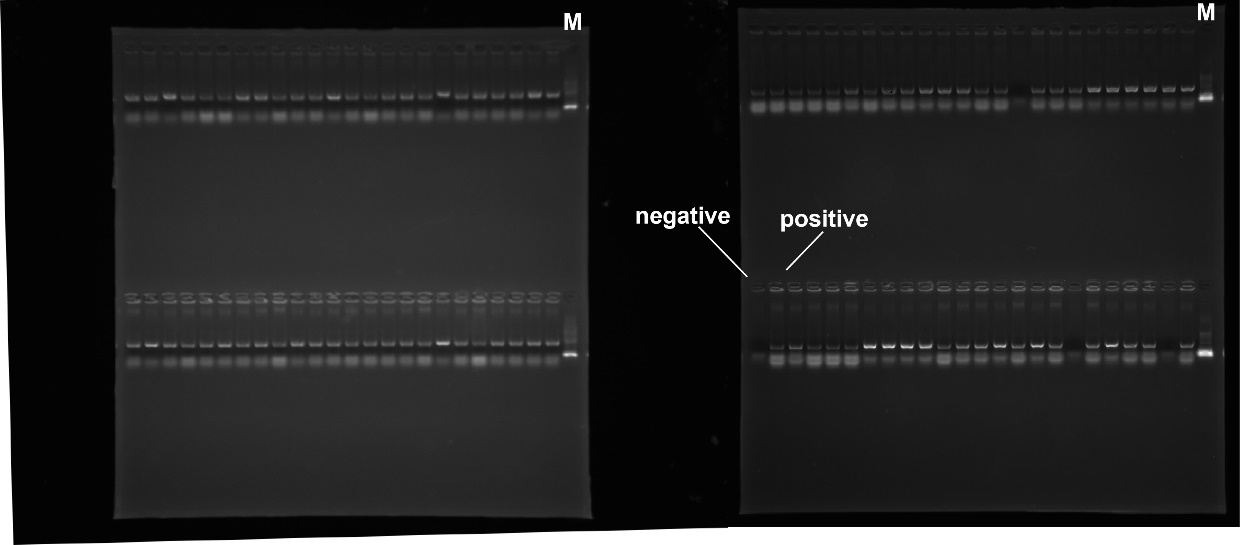


*bla*KPC


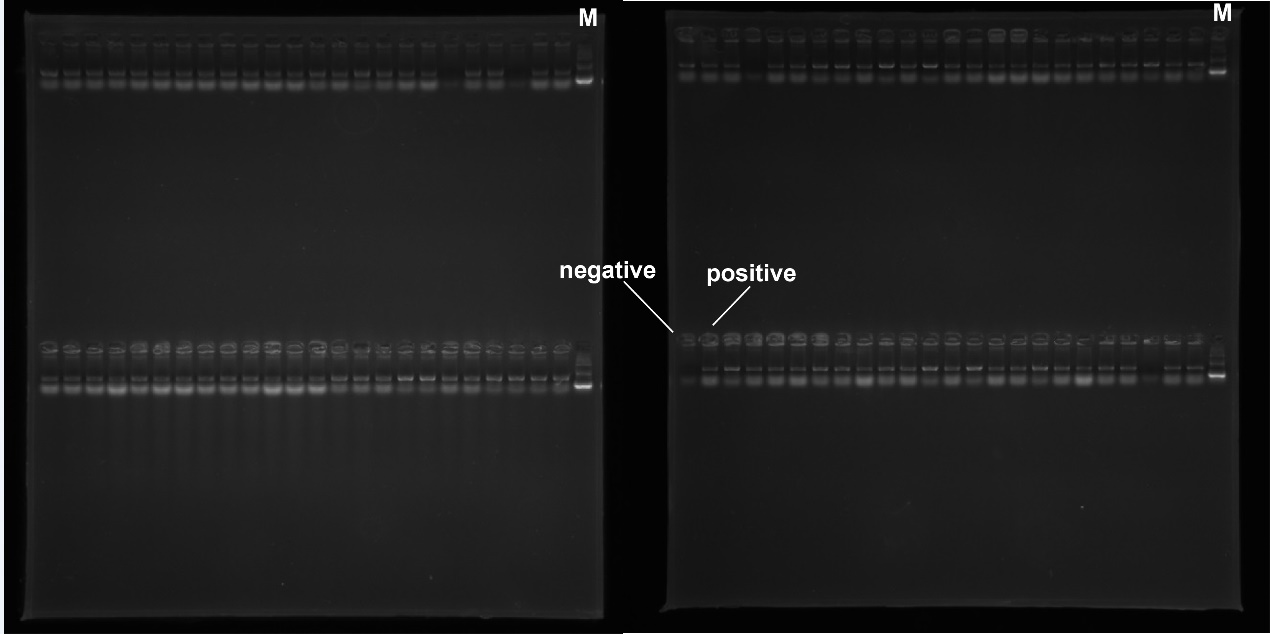


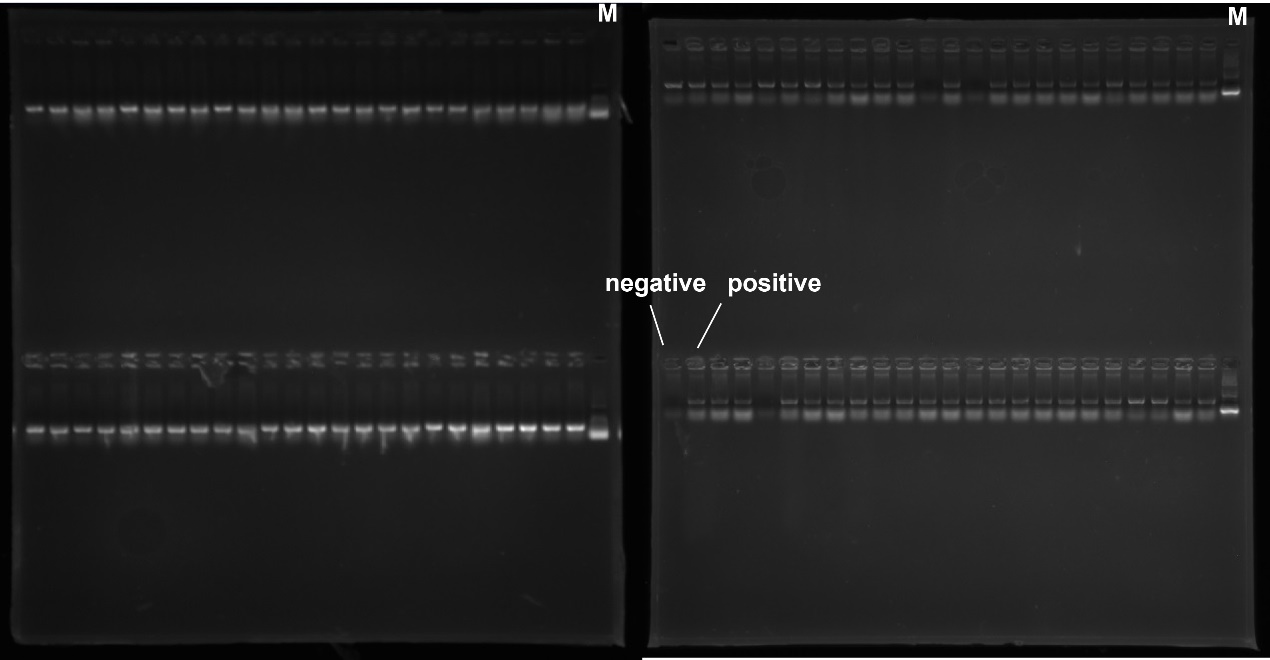

Supplement: Data_Sheet_1.zip [file Data_Sheet_1.zip]
